# Supplementary material for: Exogenous photocatalyst-free aryl radical generation from diaryliodonium salts and use in metal-catalyzed C–H arylation
Source: Royal Society of Chemistry journal article supplement (doi:10.1039/d4cc01259c), 2024-01-01

### A. NMR spectra

#### 1a. 3'-CF<sub>3</sub>-2-phenylpyridine:

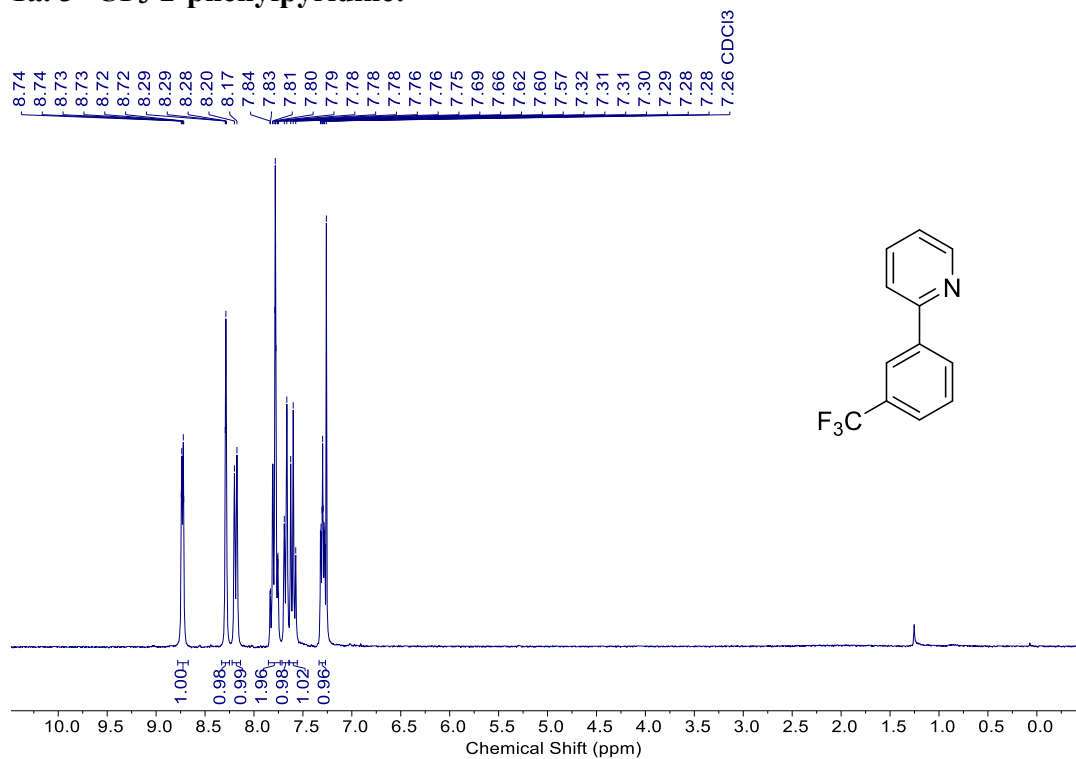

#### 1b. 2-phenylpyridine:

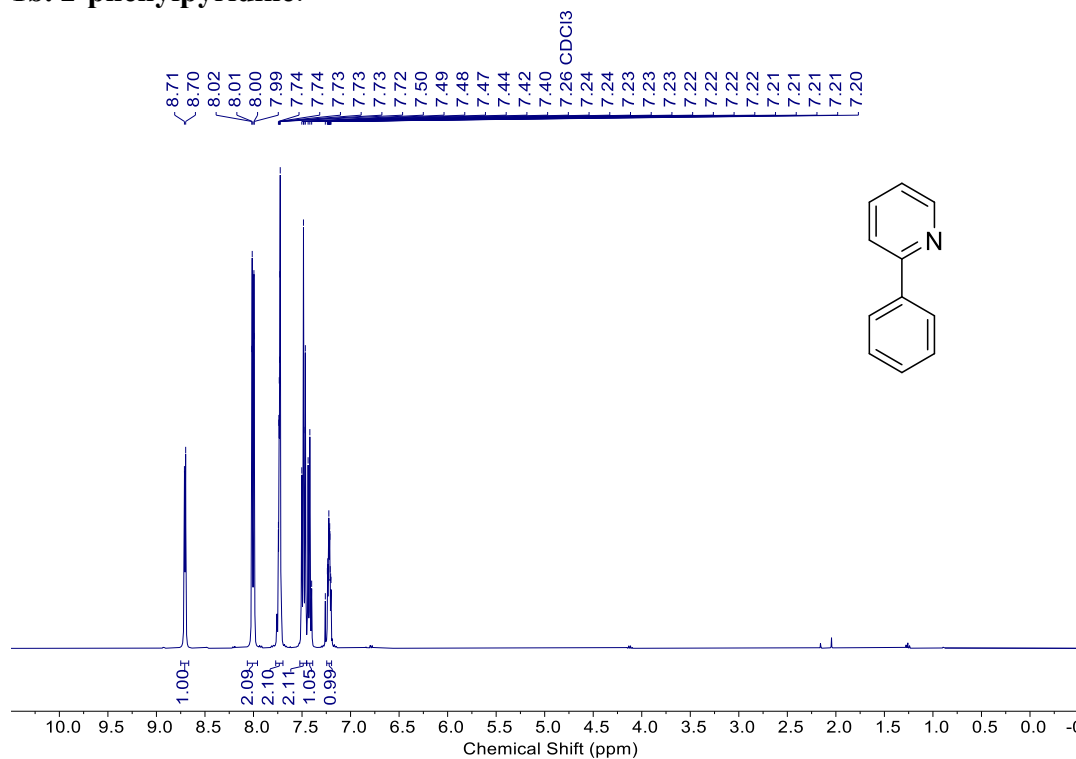

### 1c. 3'-Me-2-phenylpyridine:

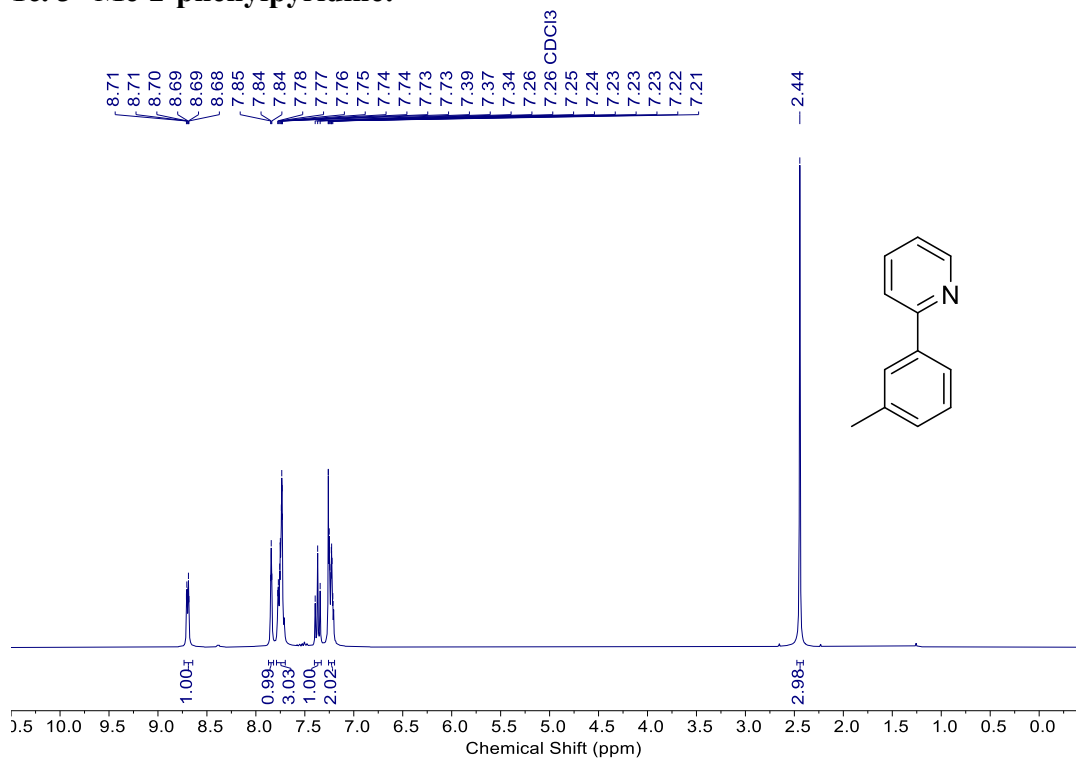

### 1d. 3'-CN-2-phenylpyridine:

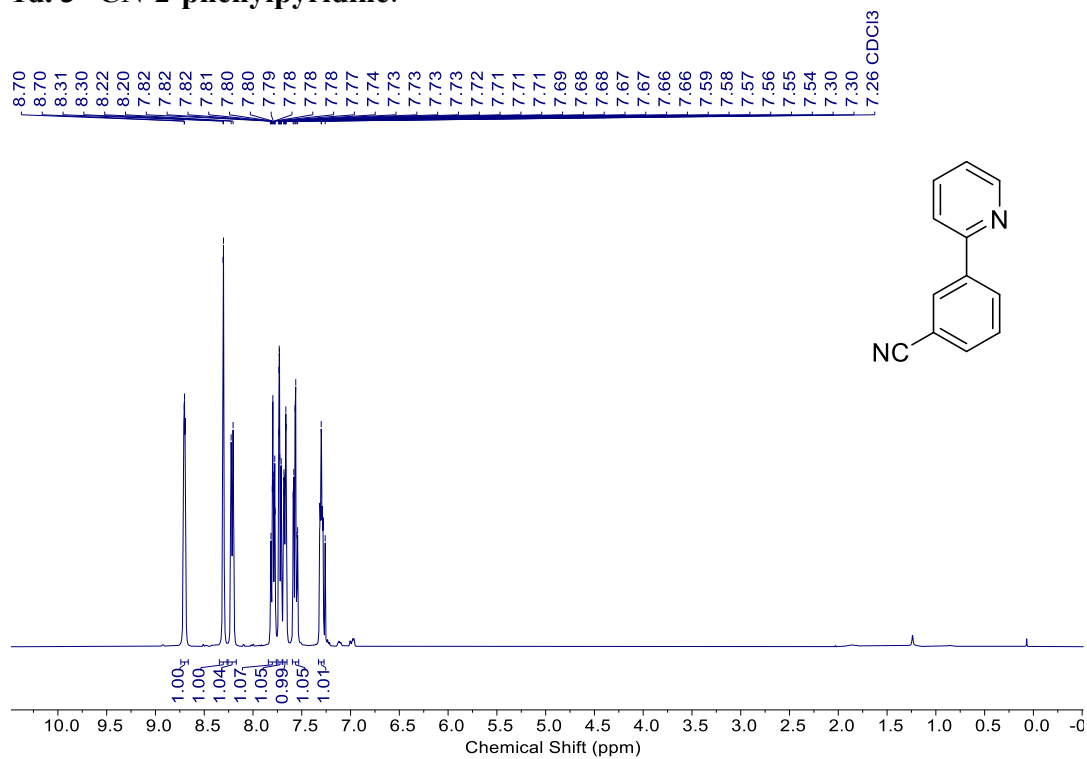

**1e. 4'-OMe-2-phenylpyridine:**

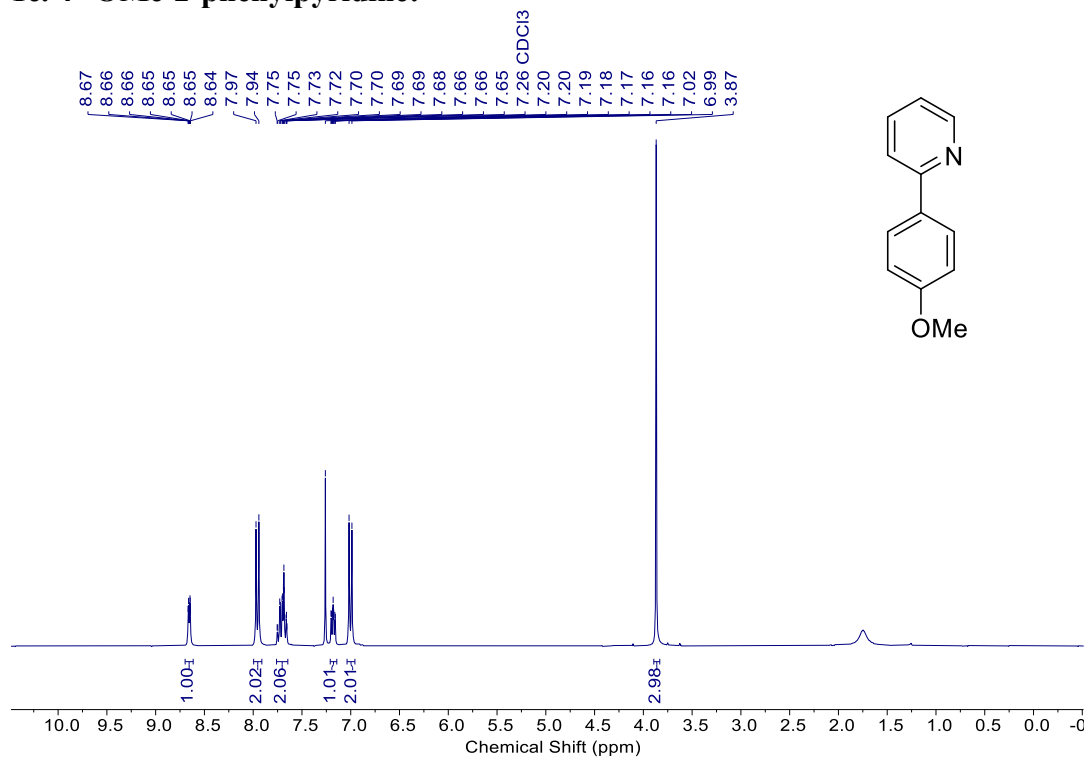

**1f. 3'-OMe-2-phenylpyridine:**

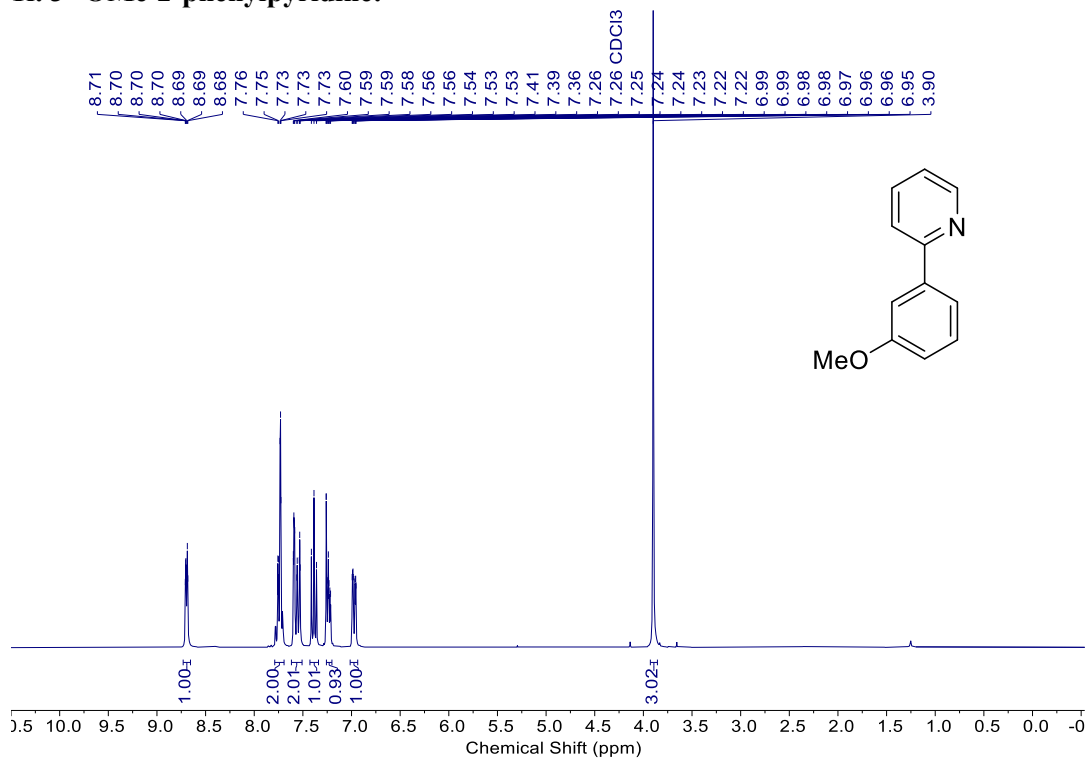

### 1g. 4-NO<sub>2</sub>-2-phenylpyridine:

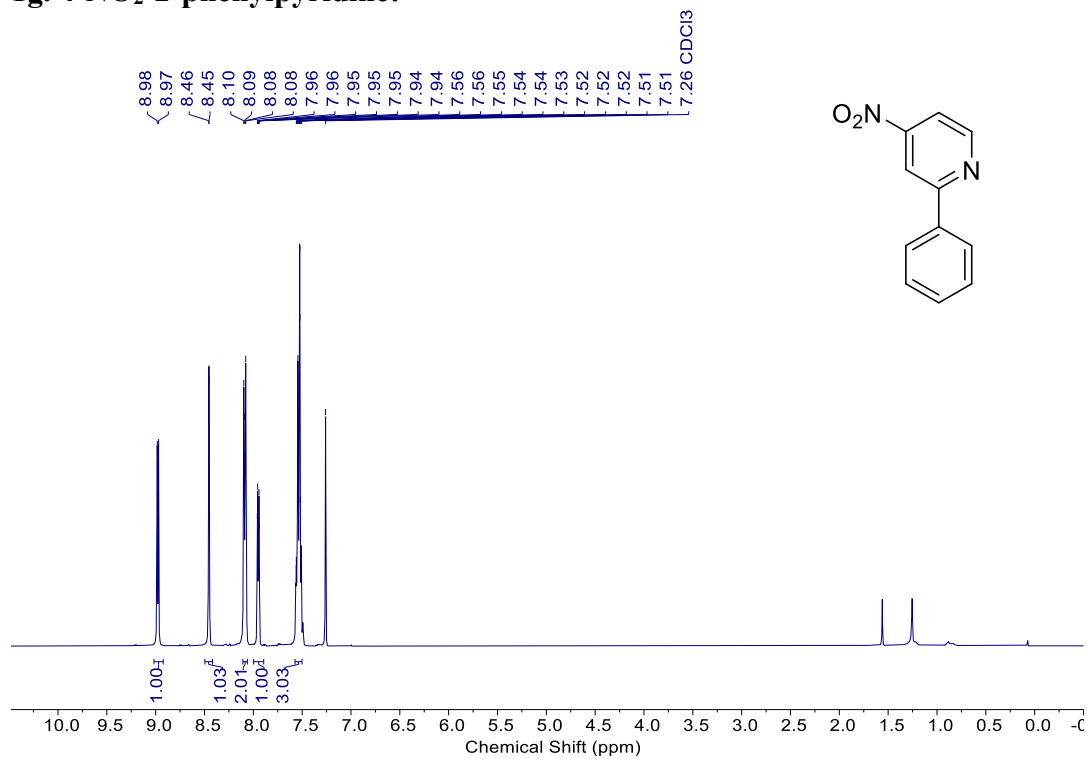

### 1h. 4-OMe-2-phenylpyridine:

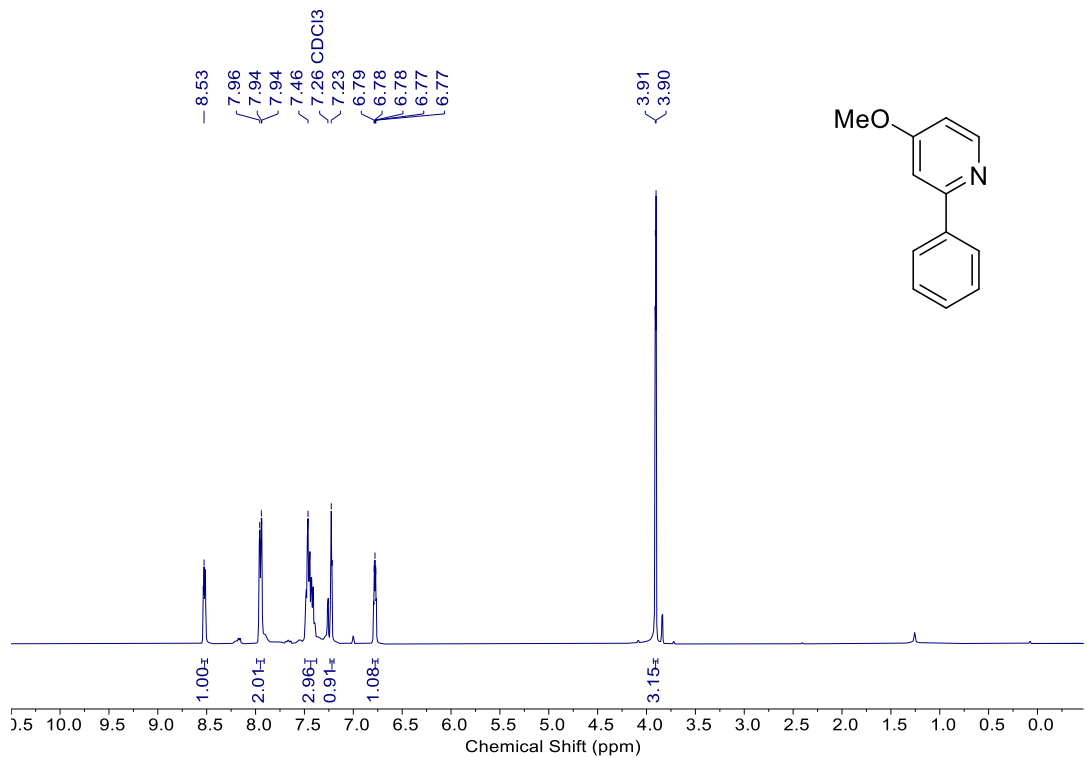

### 1i. 5-CF<sub>3</sub>-2-phenylpyridine:

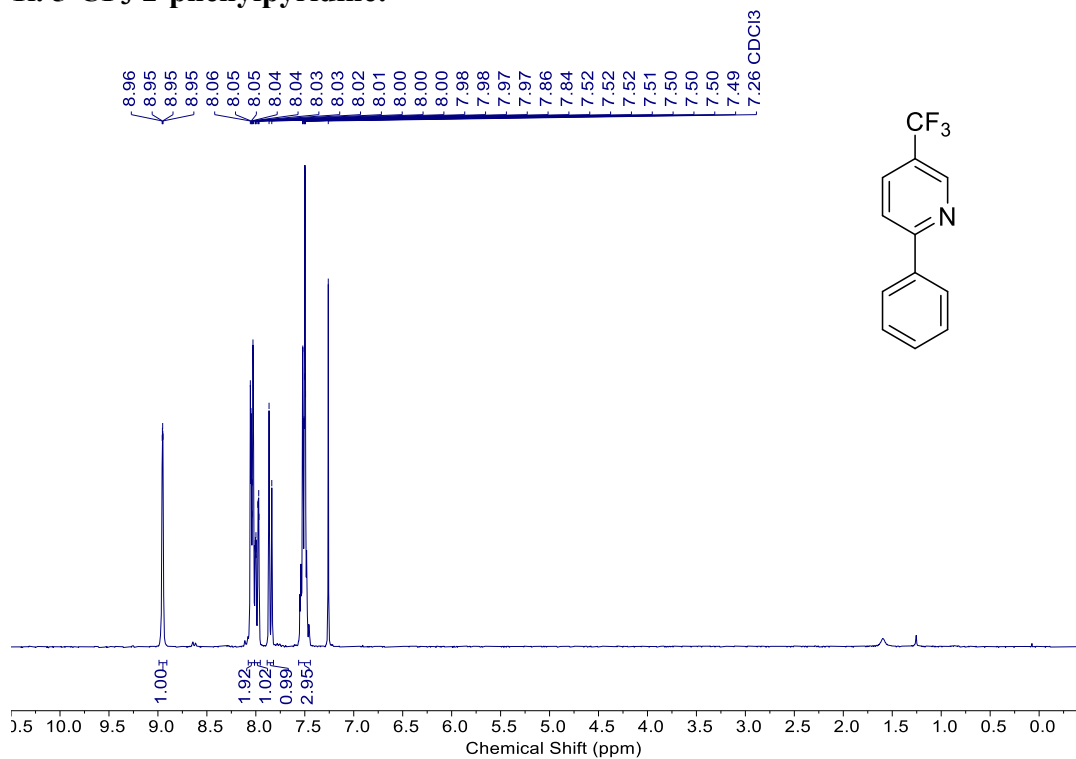

### 1j. 5-Me-2-phenylpyridine:

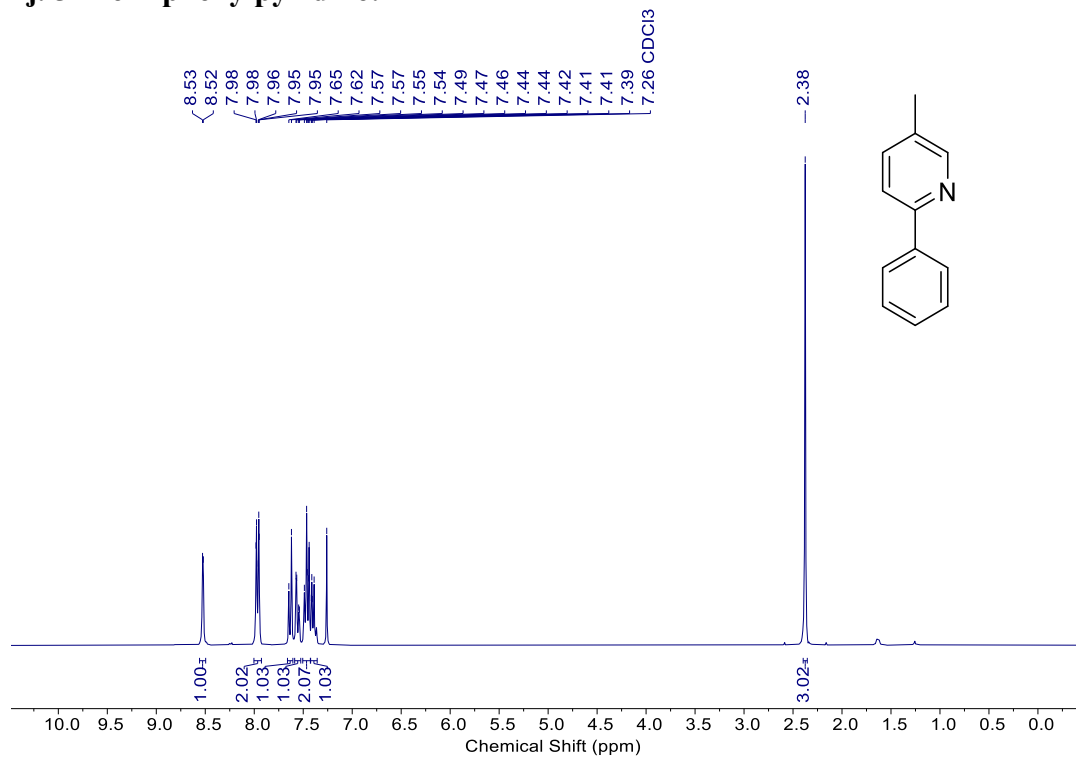

**1k. 3'-tBu-2-phenylpyridine:**

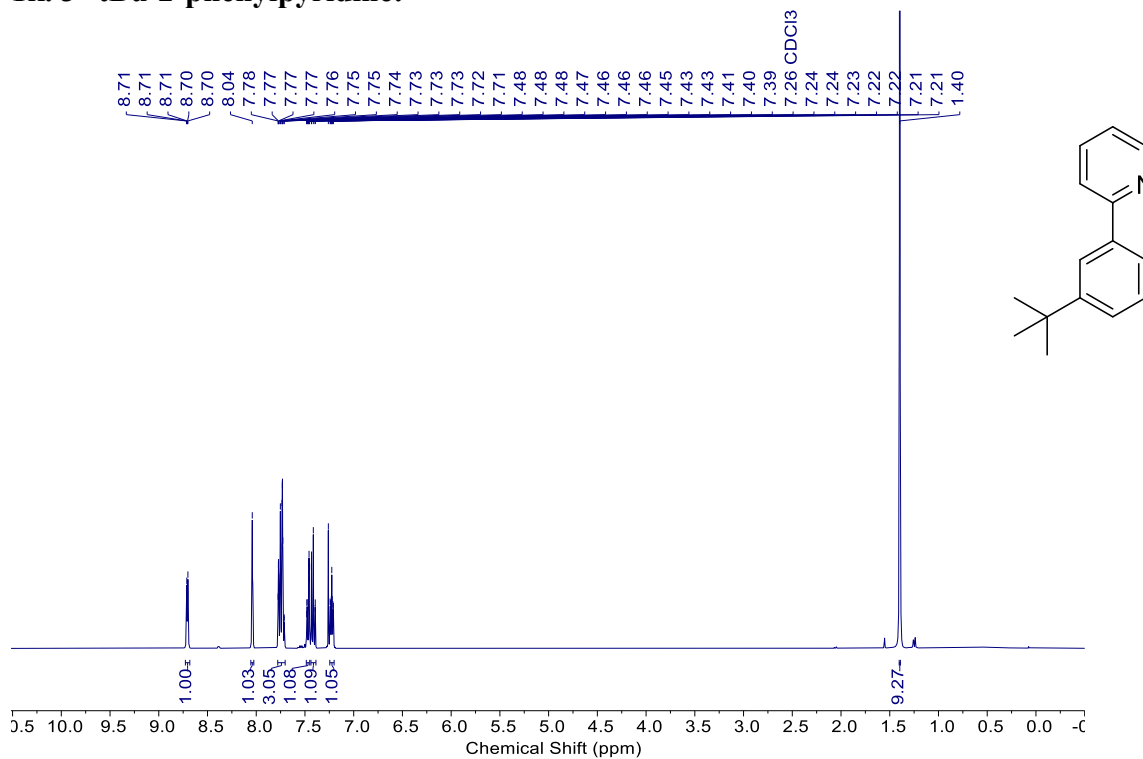

**1l. 4-OMe-3'-OMe-2-phenylpyridine:**

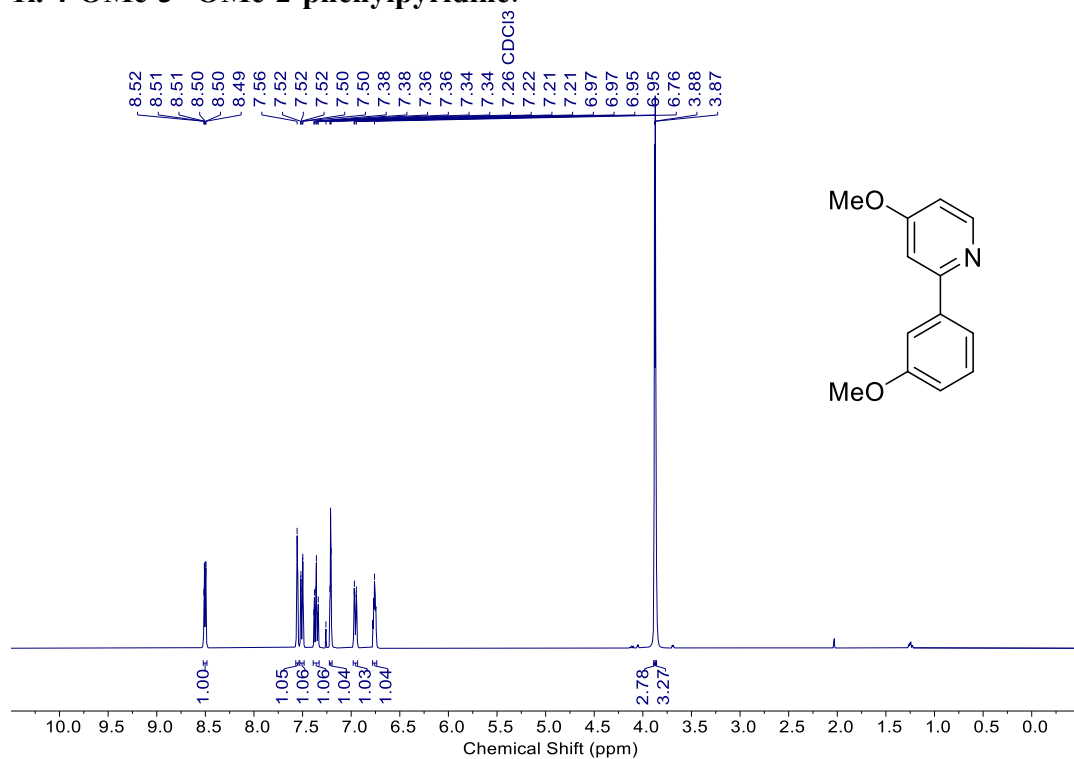

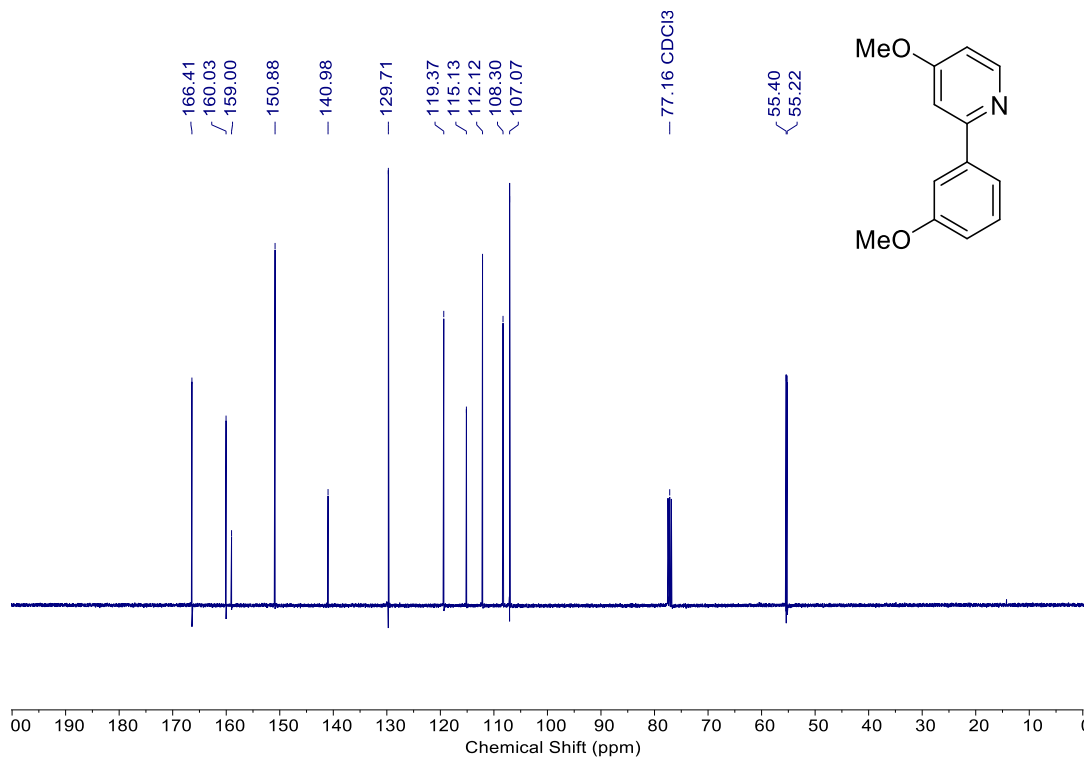

**1m. 3'-NHAc-2-phenylpyridine:**

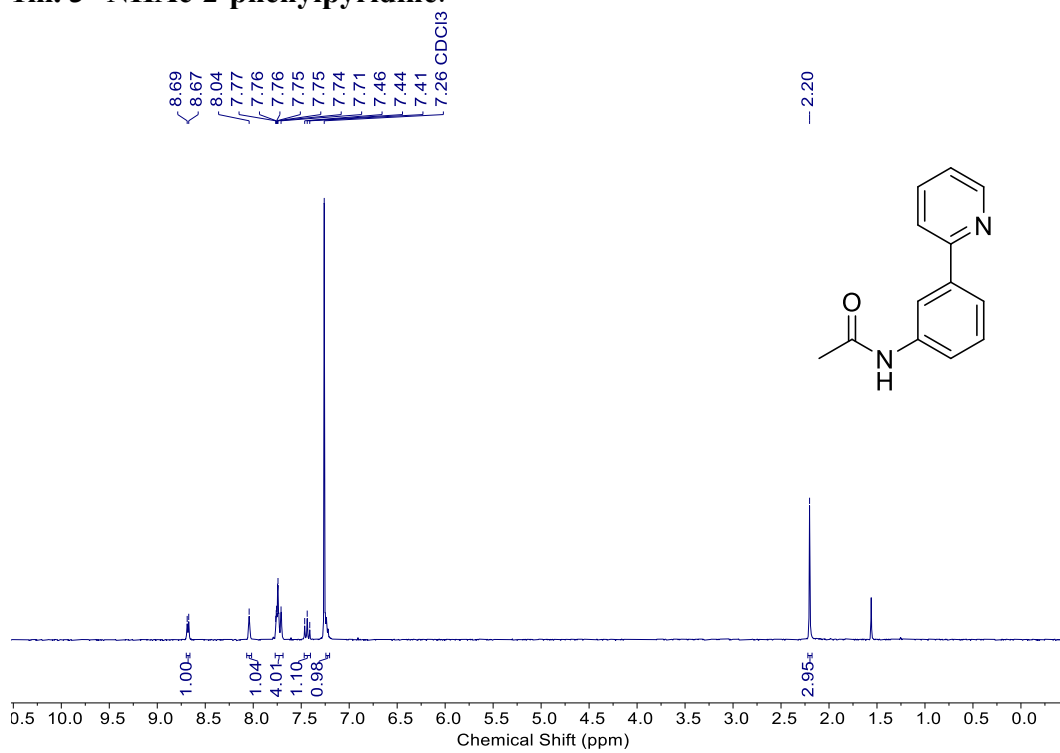

**1n. 4'-CF<sub>3</sub>-2-phenylpyridine:**

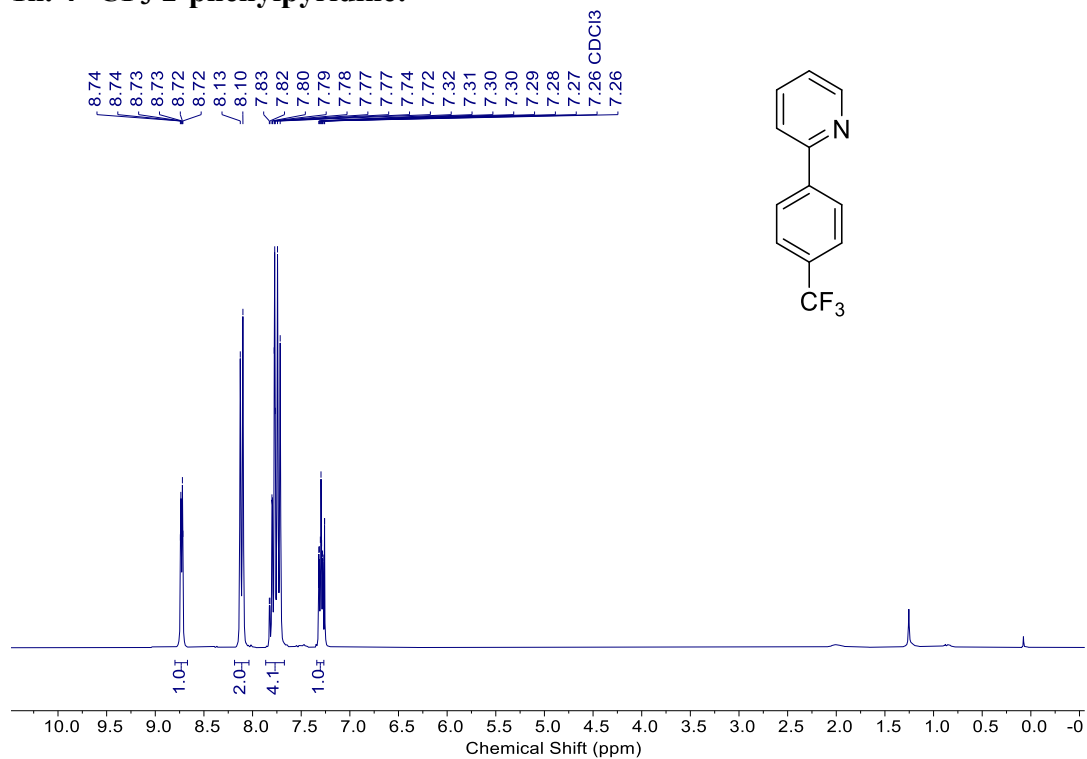

**1o. 4'-Me-2-phenylpyridine:**

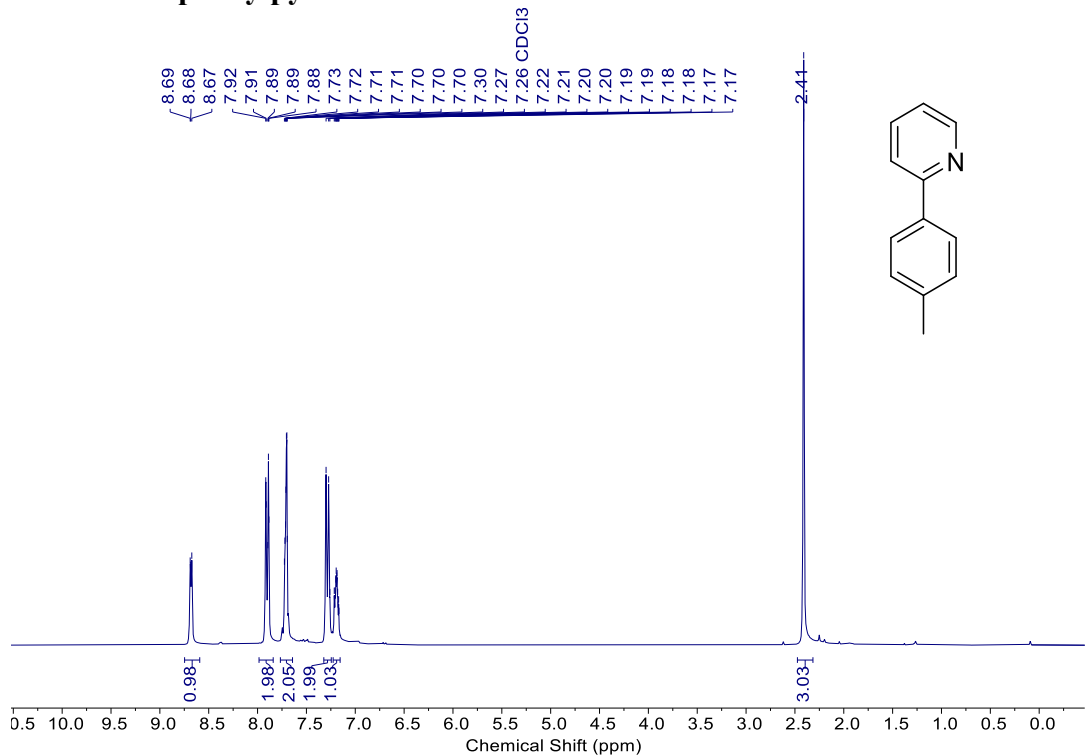



### 1p. 4'-Cl-2-phenylpyridine:

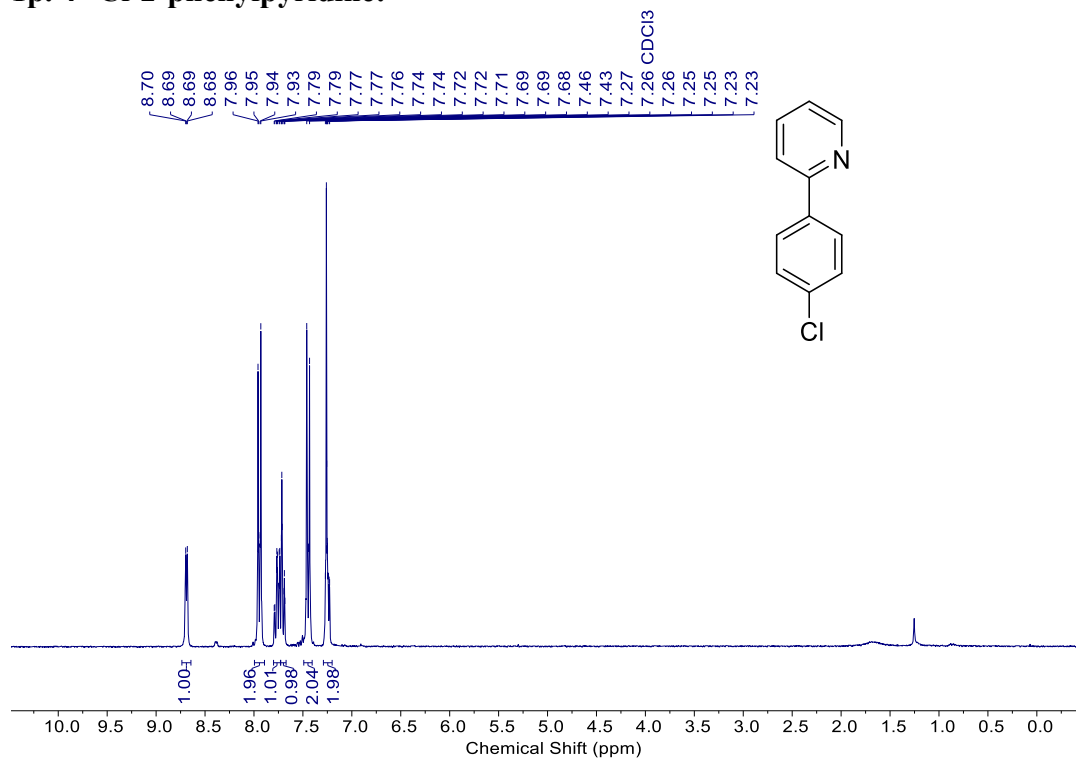

### 1q. 4'-Ph-2-phenylpyridine

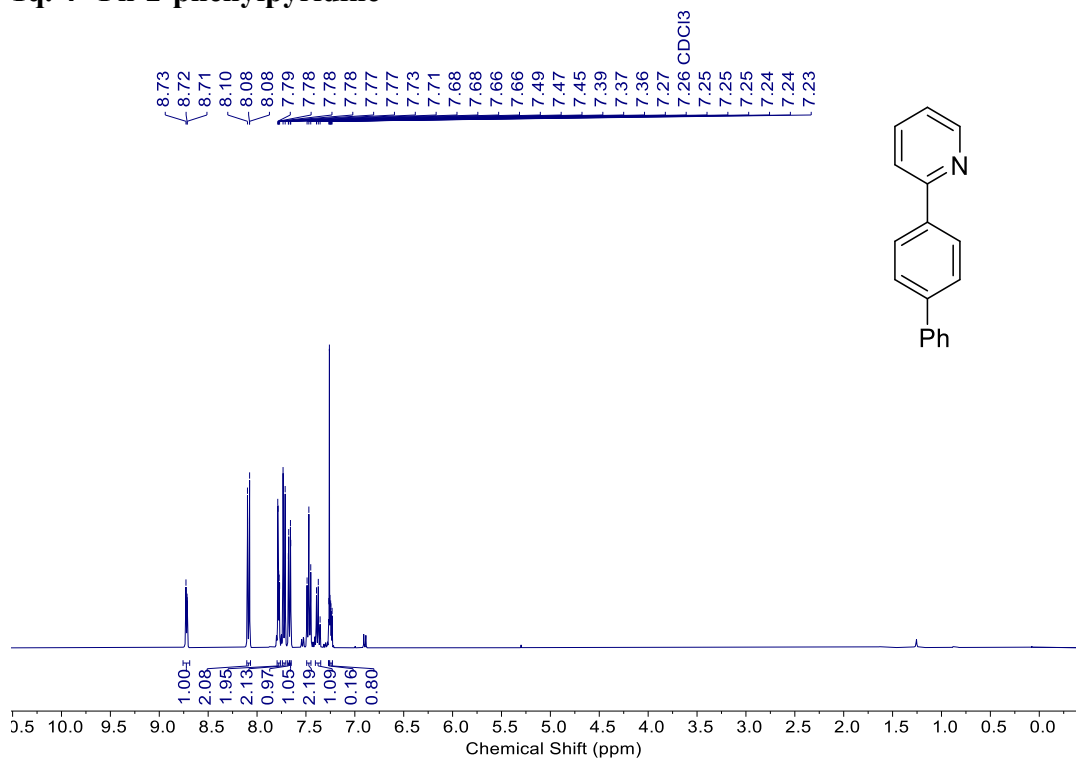

### 1r. 3'-Cl-2-phenylpyridine

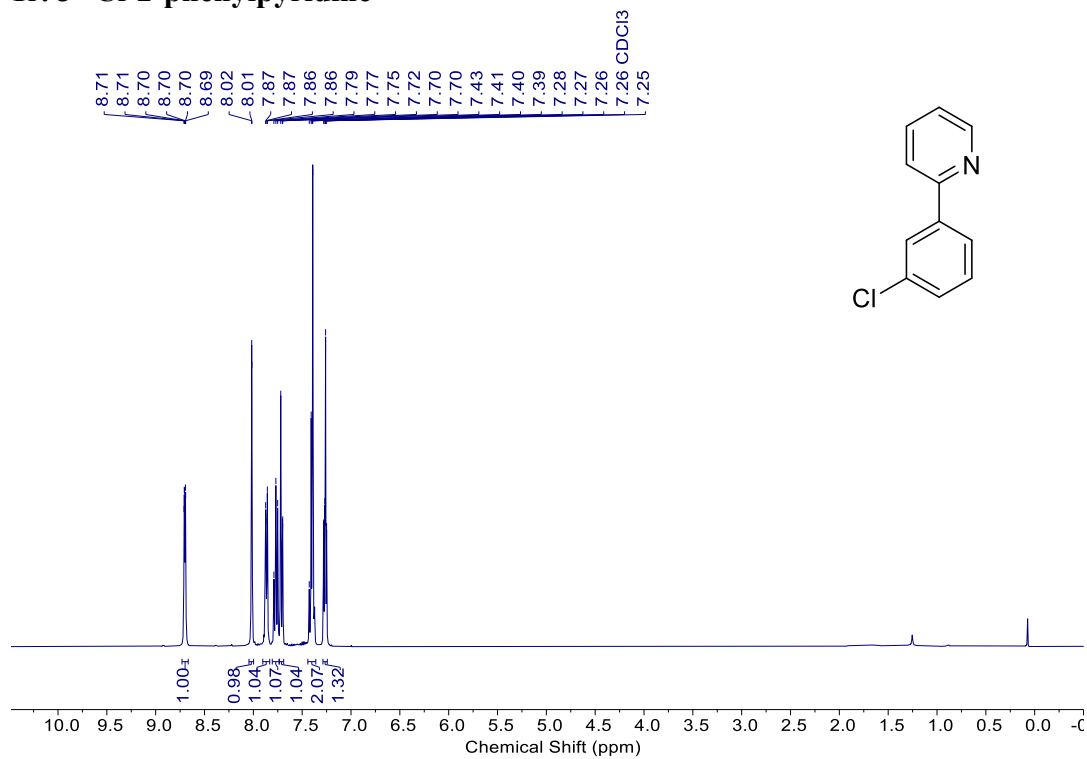

### 1s. 4-Cl-2-phenylpyridine:

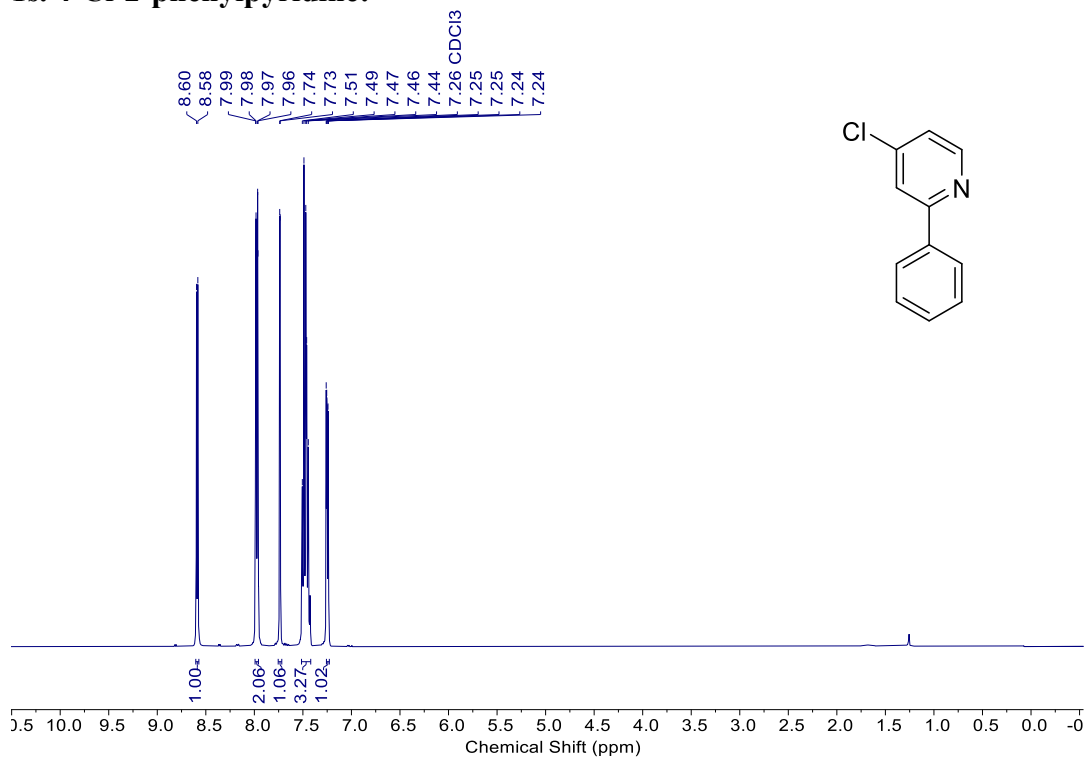

### 1t. 4'-Ac-2-pyridine:

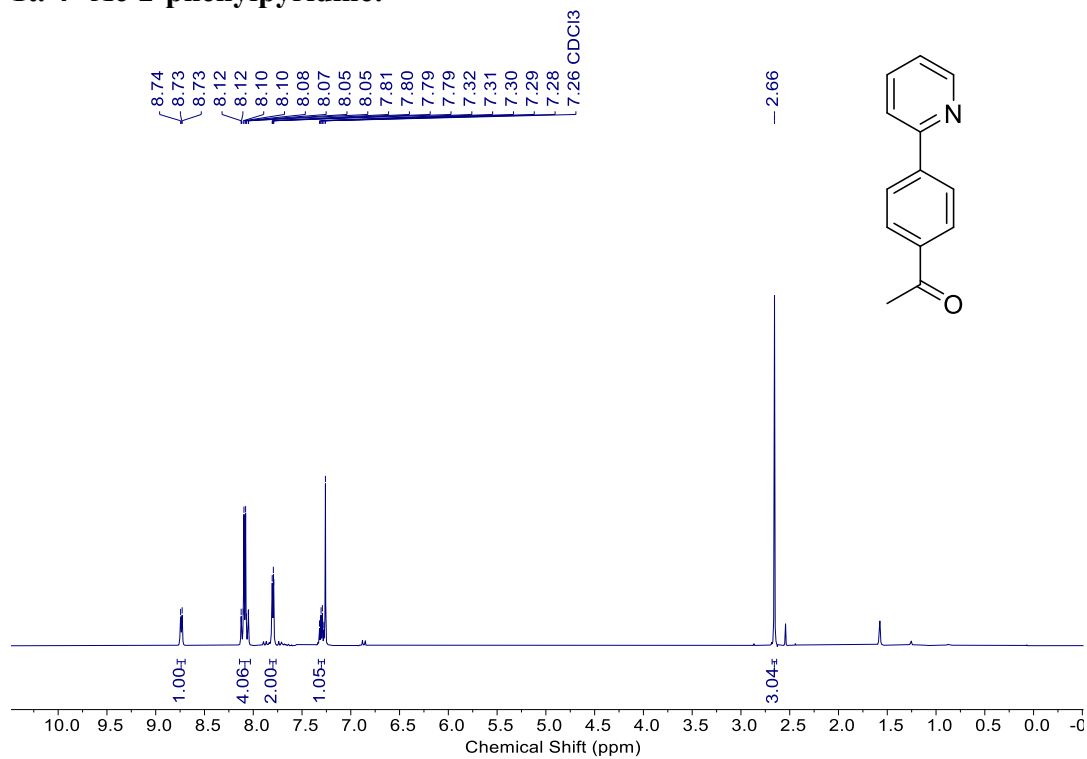

### 1u. 2-phenylisoquinoline:

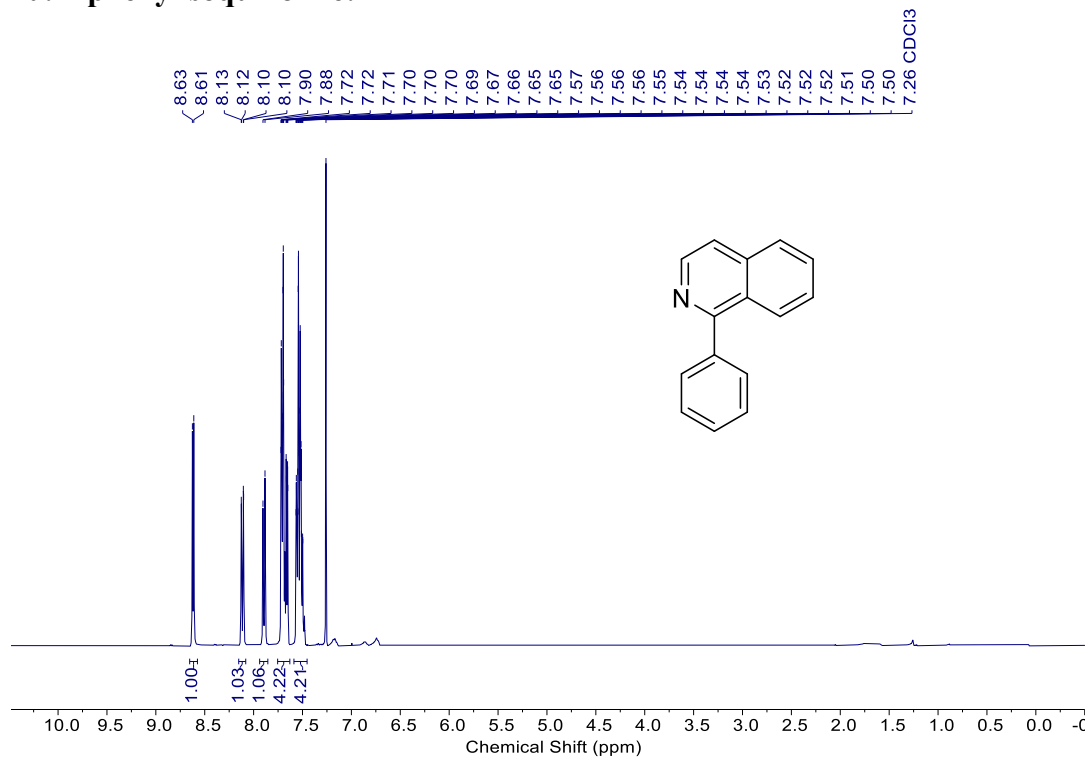

## 2a. Diphenyliodonium triflate:

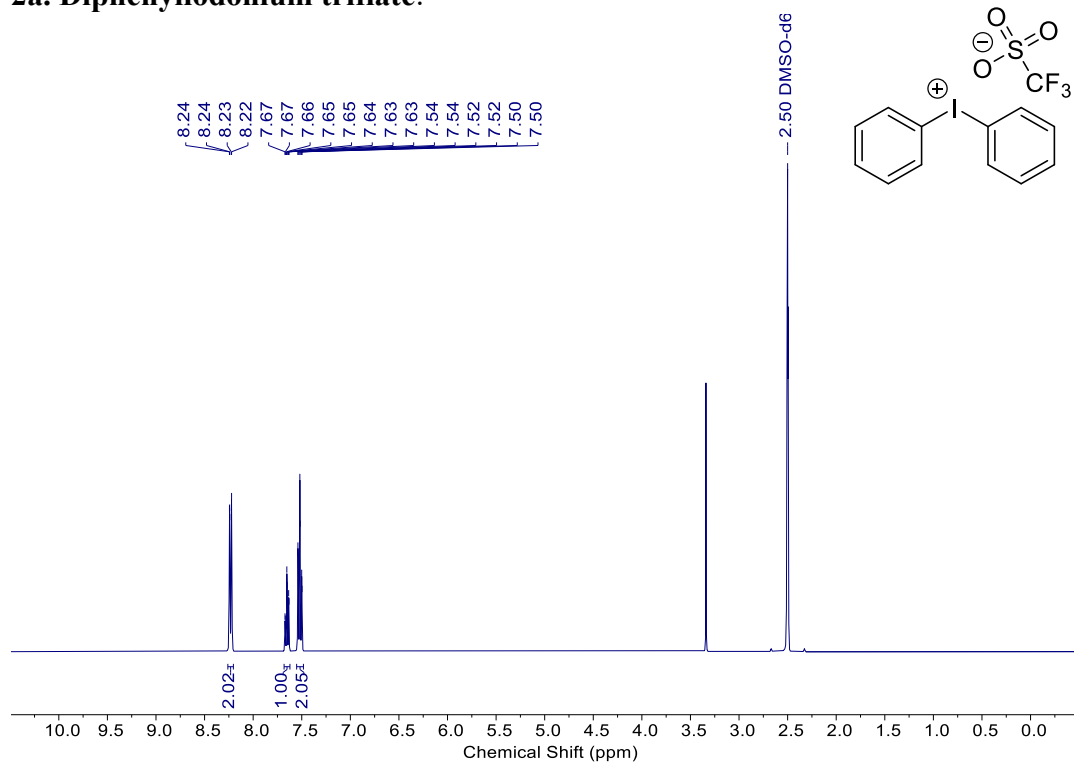

## 2b. 4-methoxyphenylmesityl iodonium triflate:

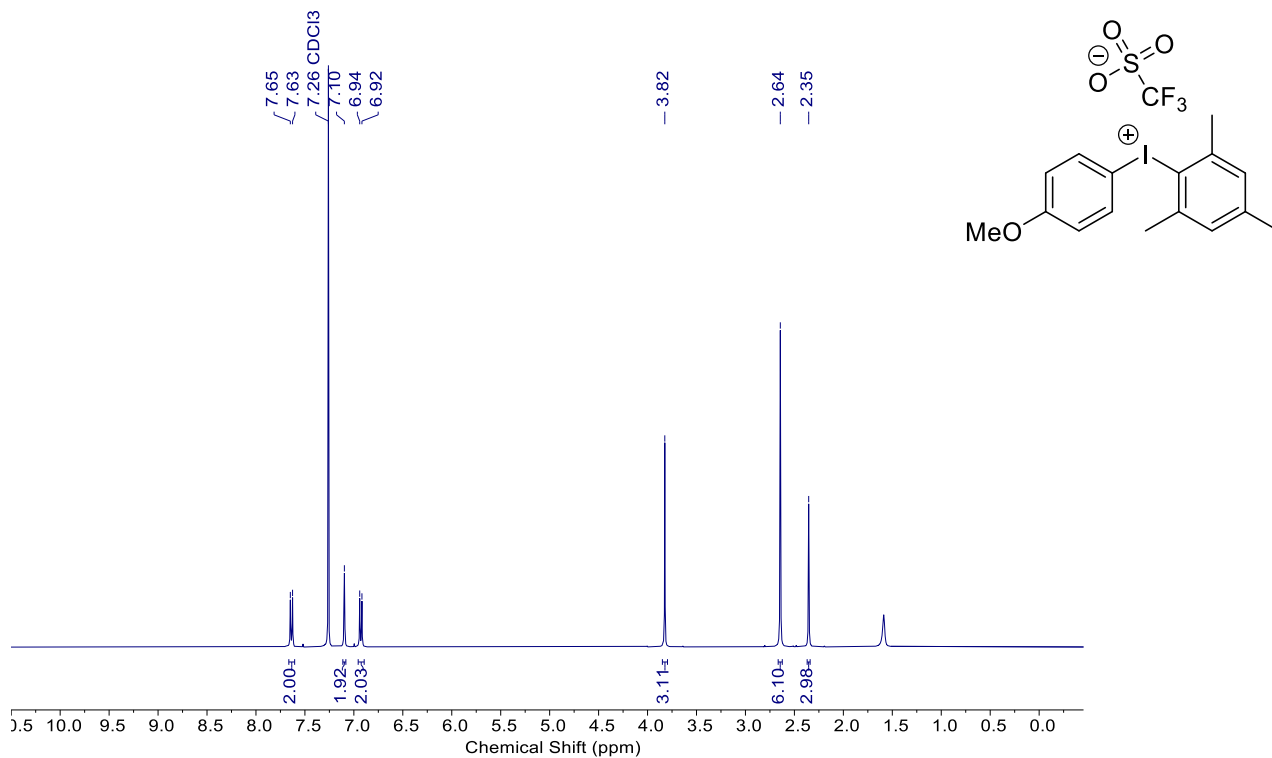

**2c. 4-methylphenylmesityl iodonium triflate:**

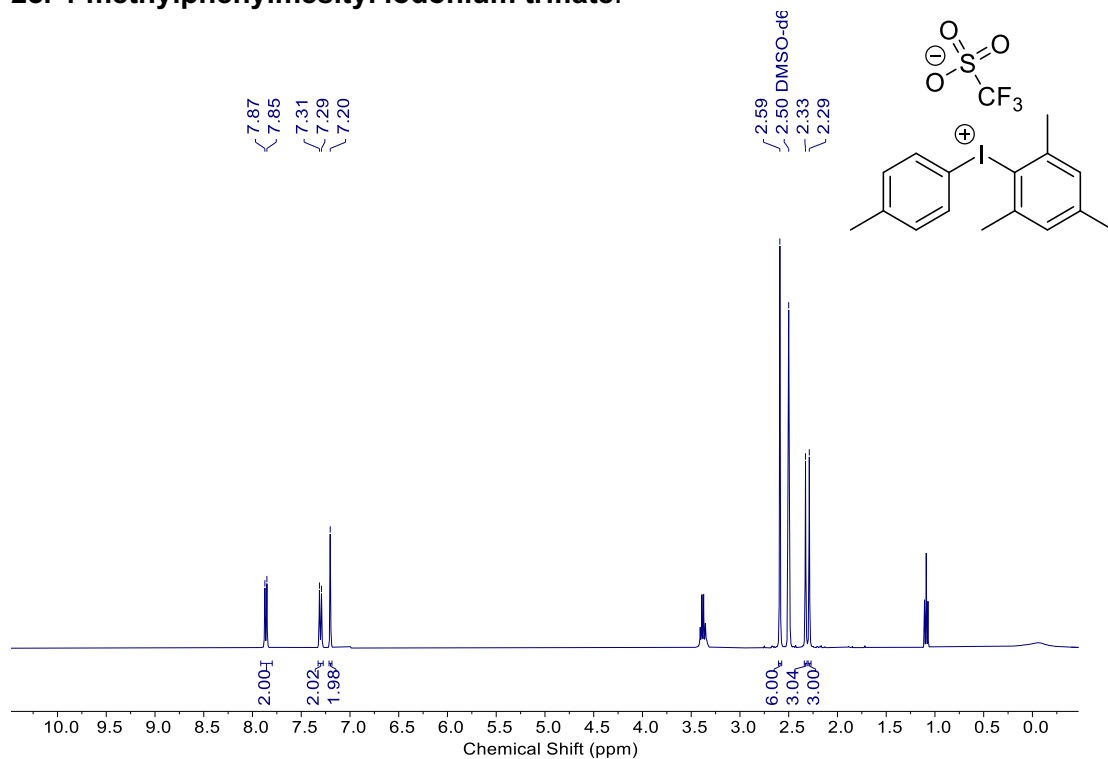

**2d. 4-biphenylmesityl iodonium triflate:**

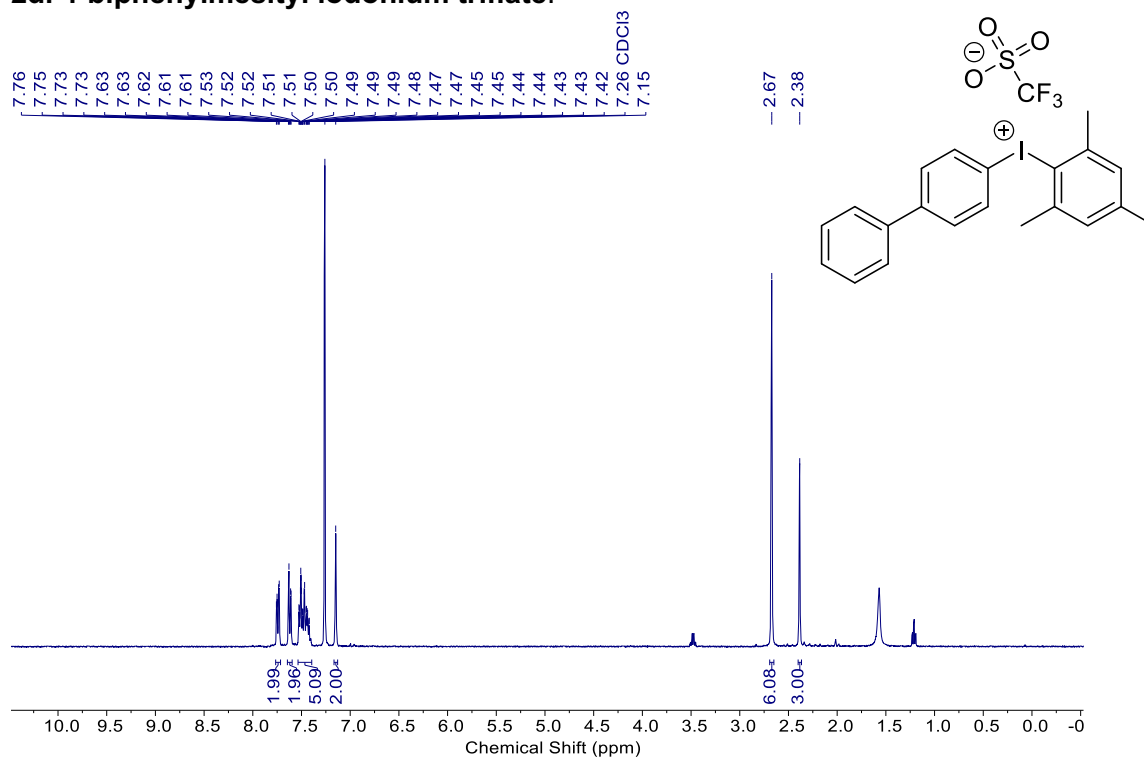

## 2e. phenylmesityl iodonium triflate:

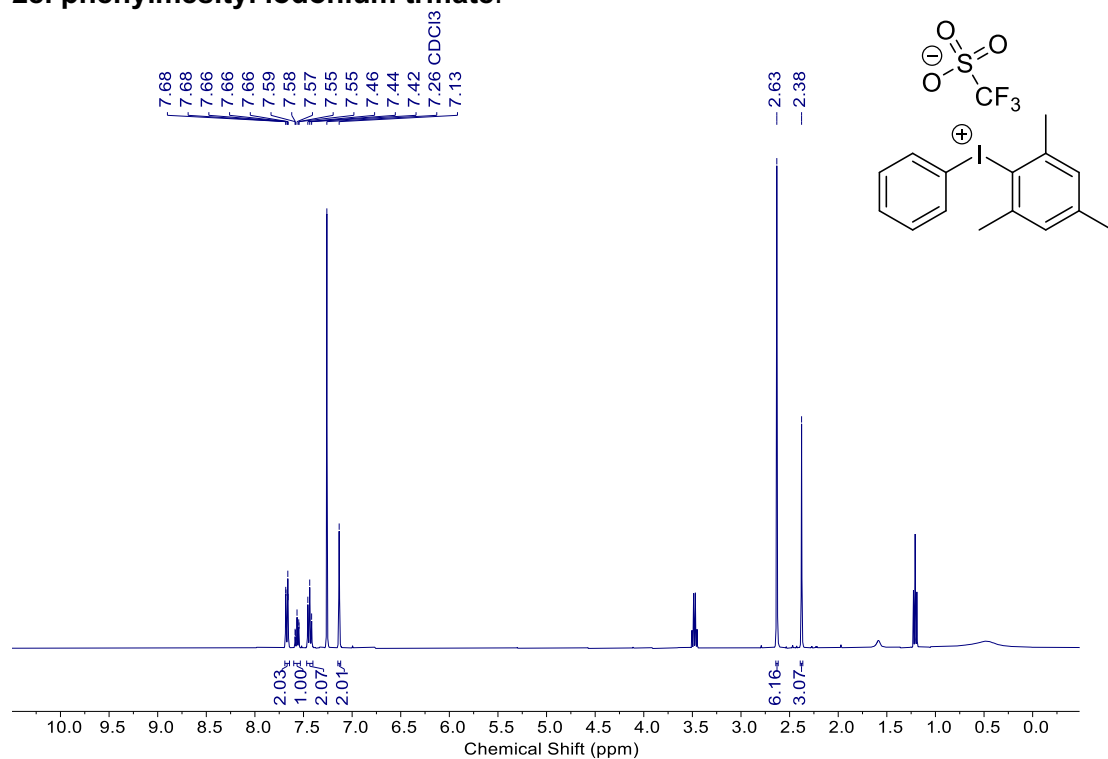

## 2f. 4-chlorophenylmesityl iodonium triflate:

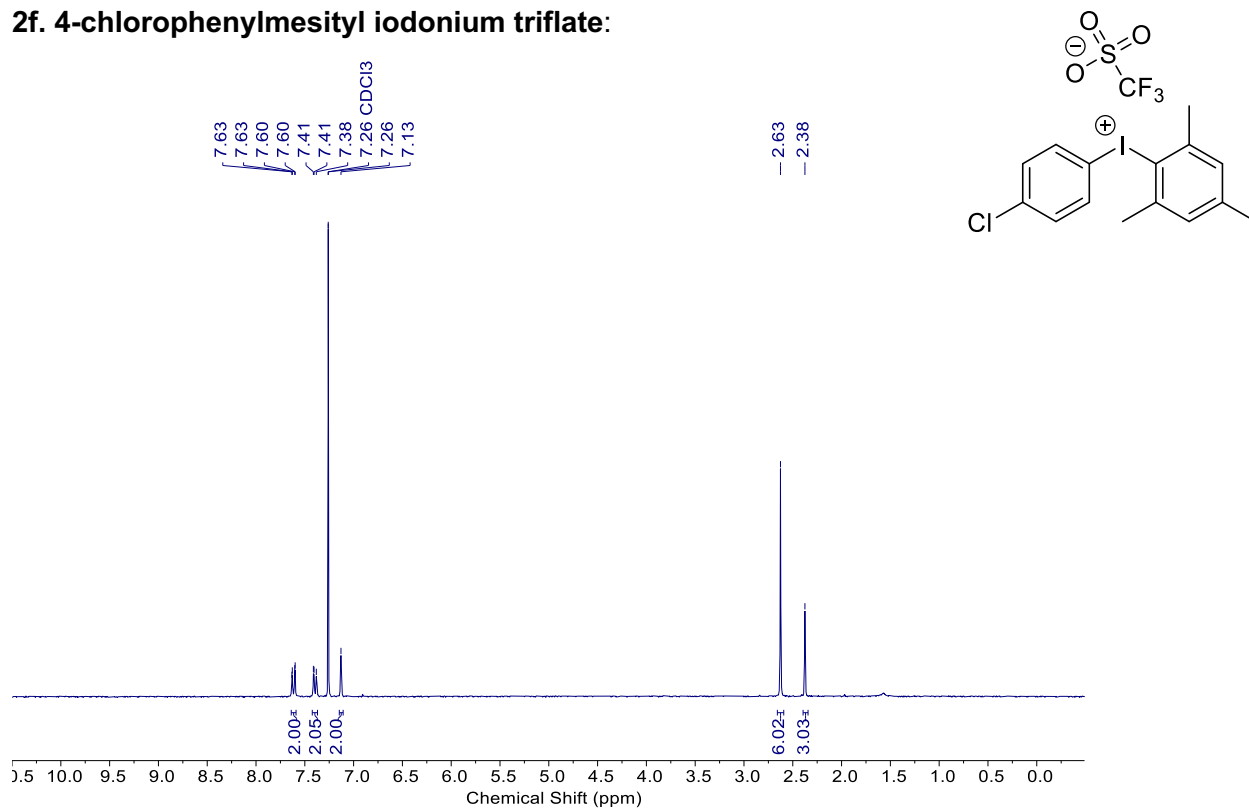

### 2g. 4-trifluoromethylphenylmesityl iodonium triflate:

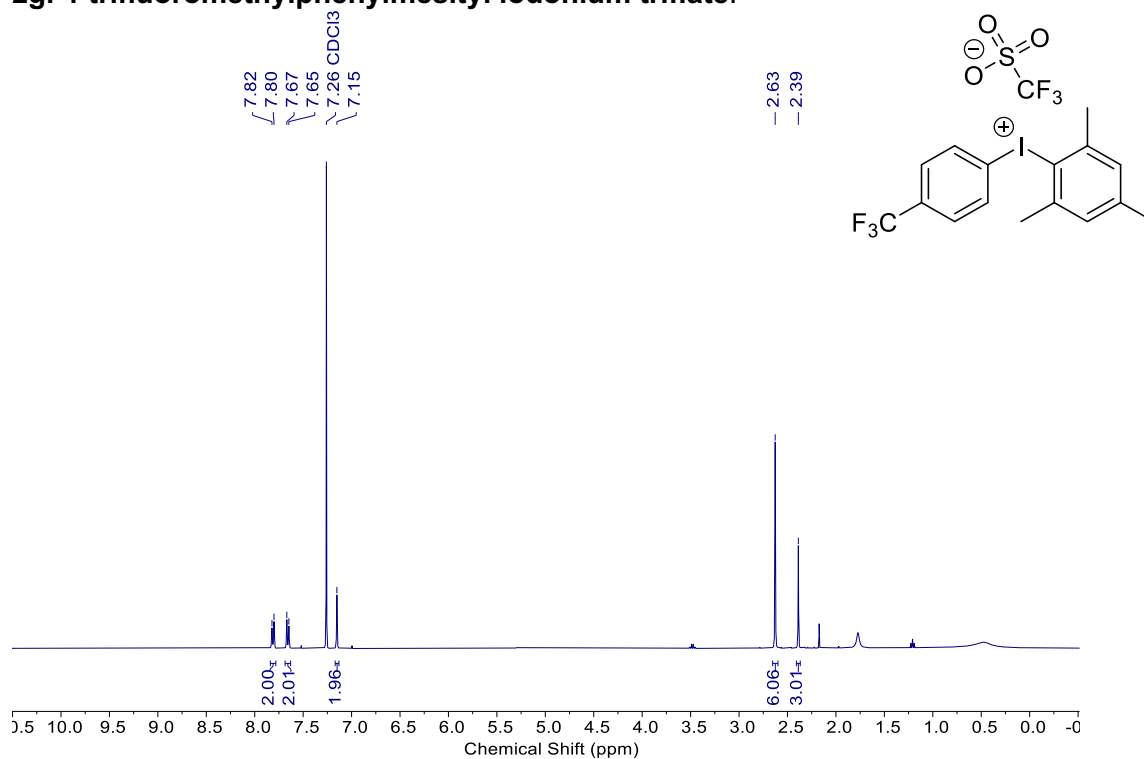

### 4b. 2'-Ph-2-phenylpyridine:

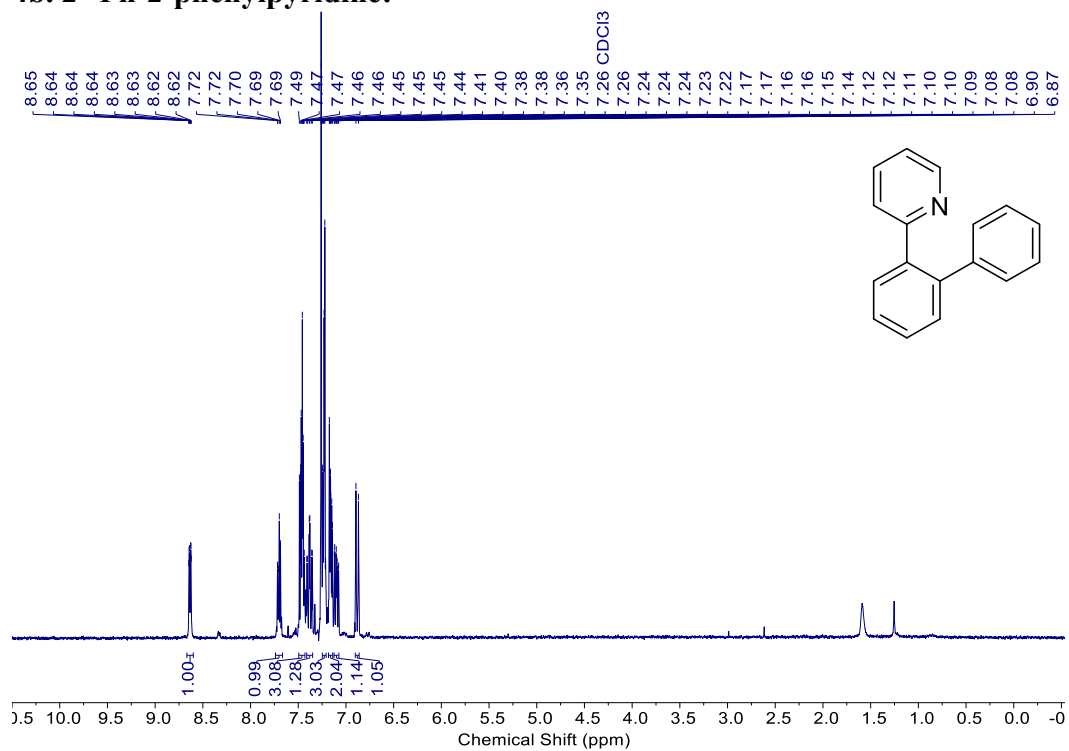

#### 4d. 2'-Ph-5'-CN-2-pyridine:

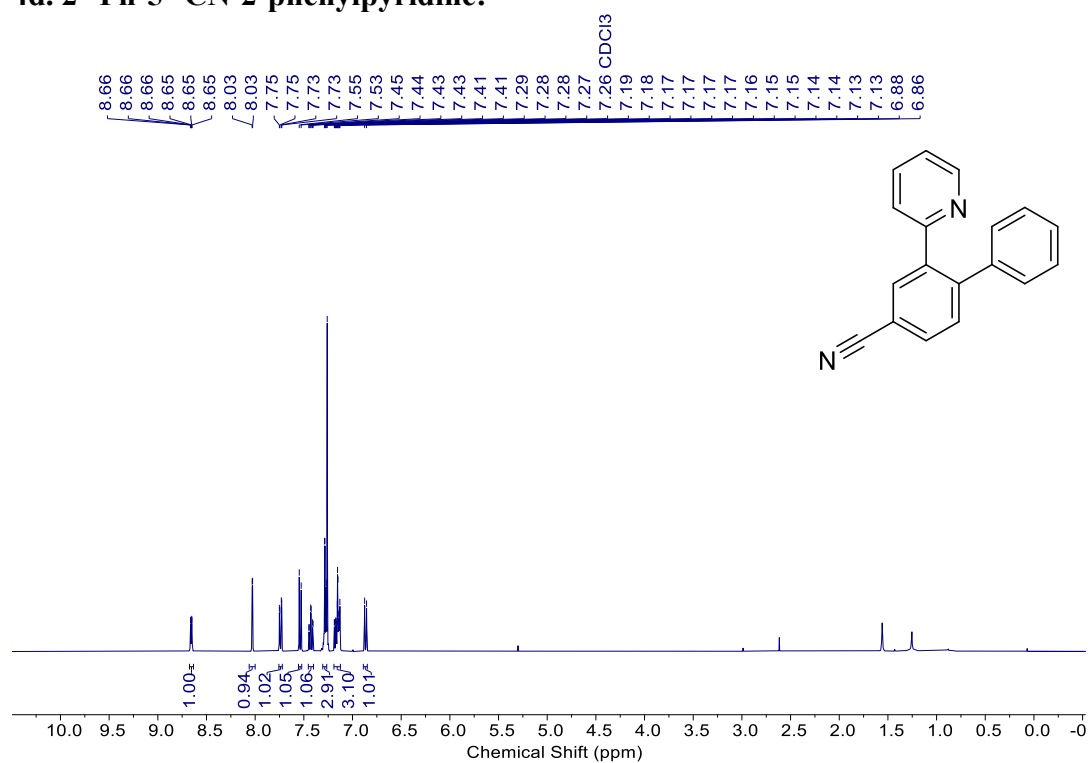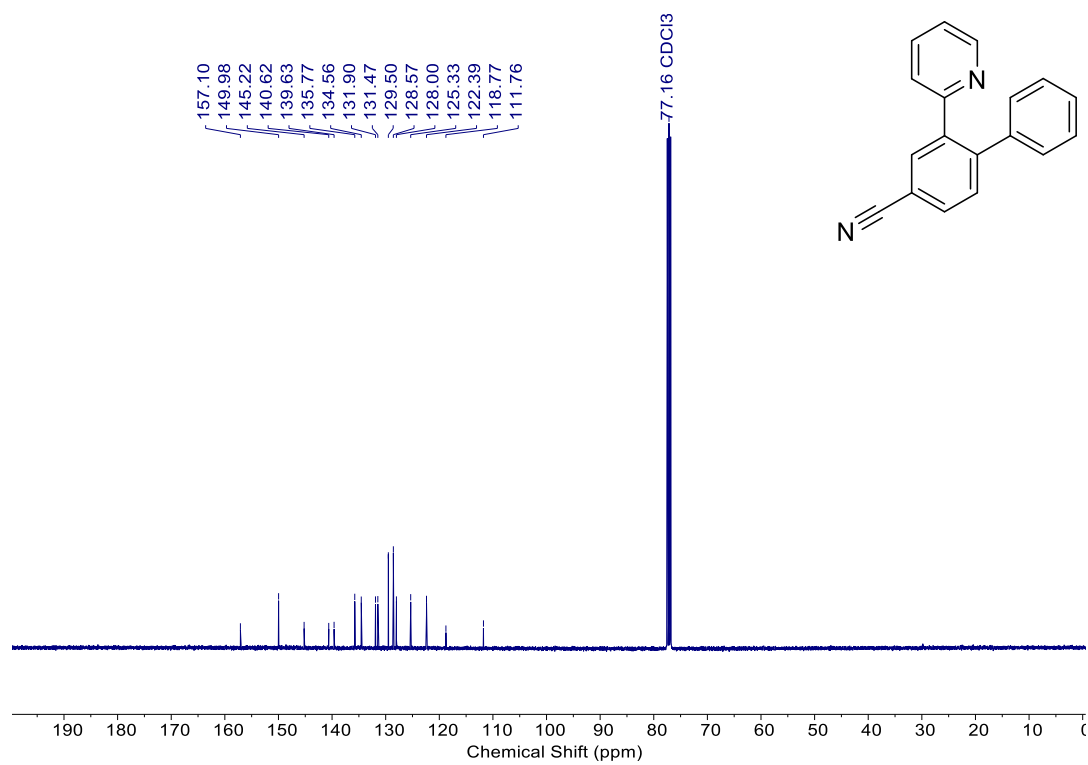



### 4k. 2'-Ph-5'-tBu-2-phenylpyridine

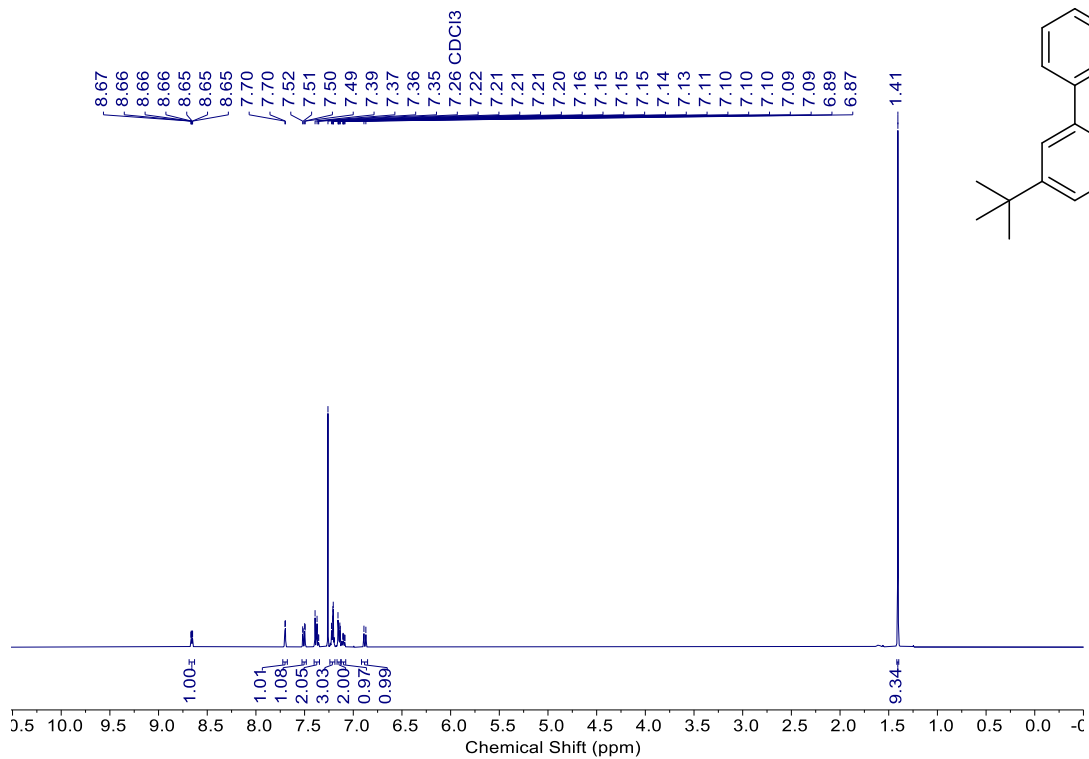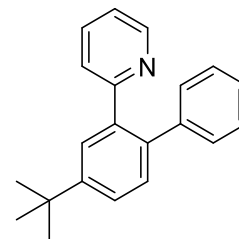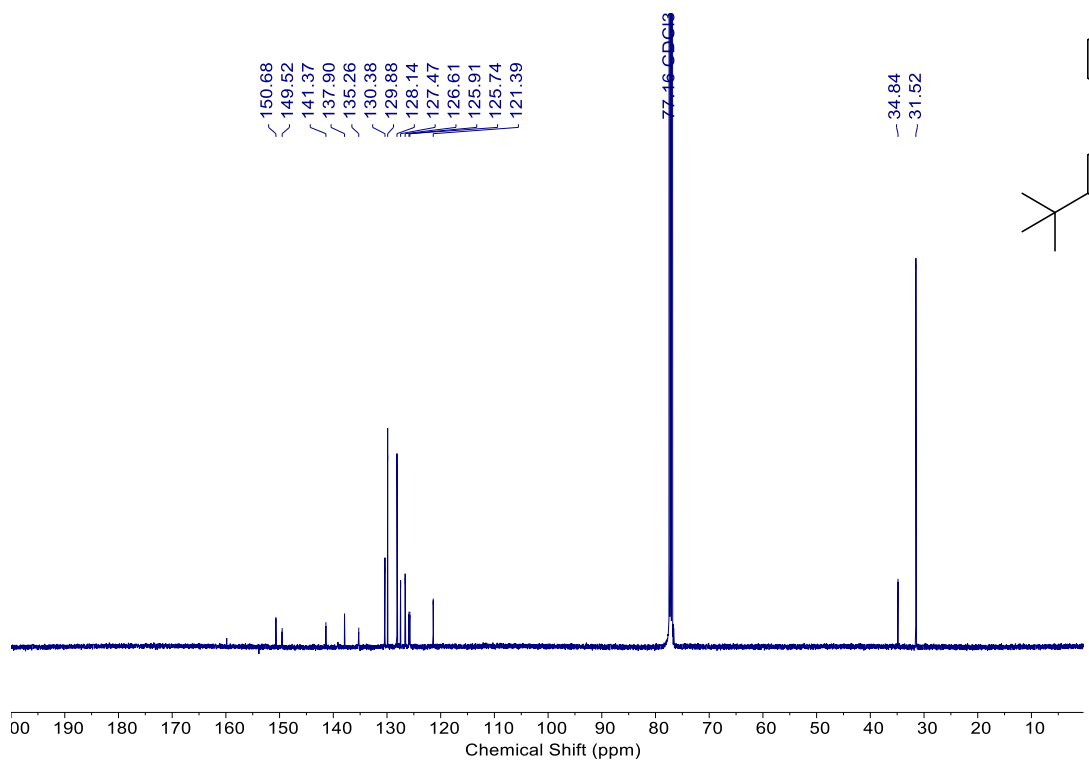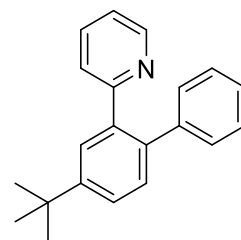

4l. 4-OMe-2'-Ph-5'-OMe-2-phenylpyridine:

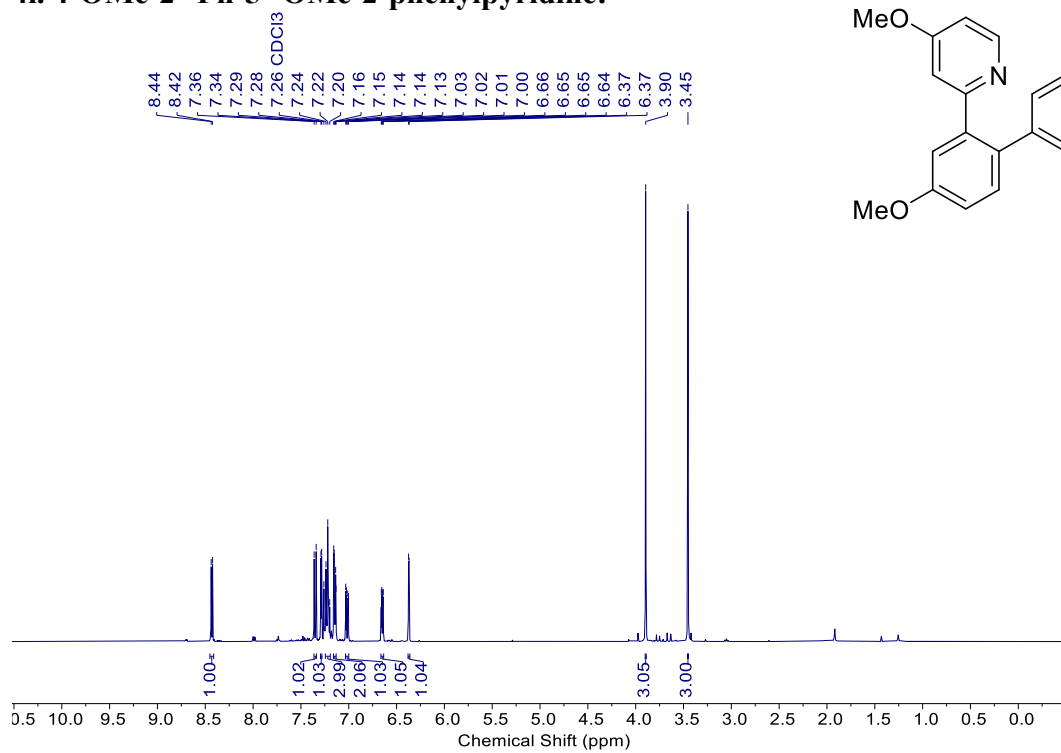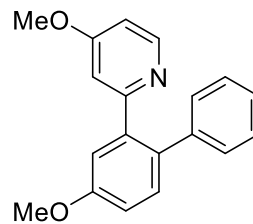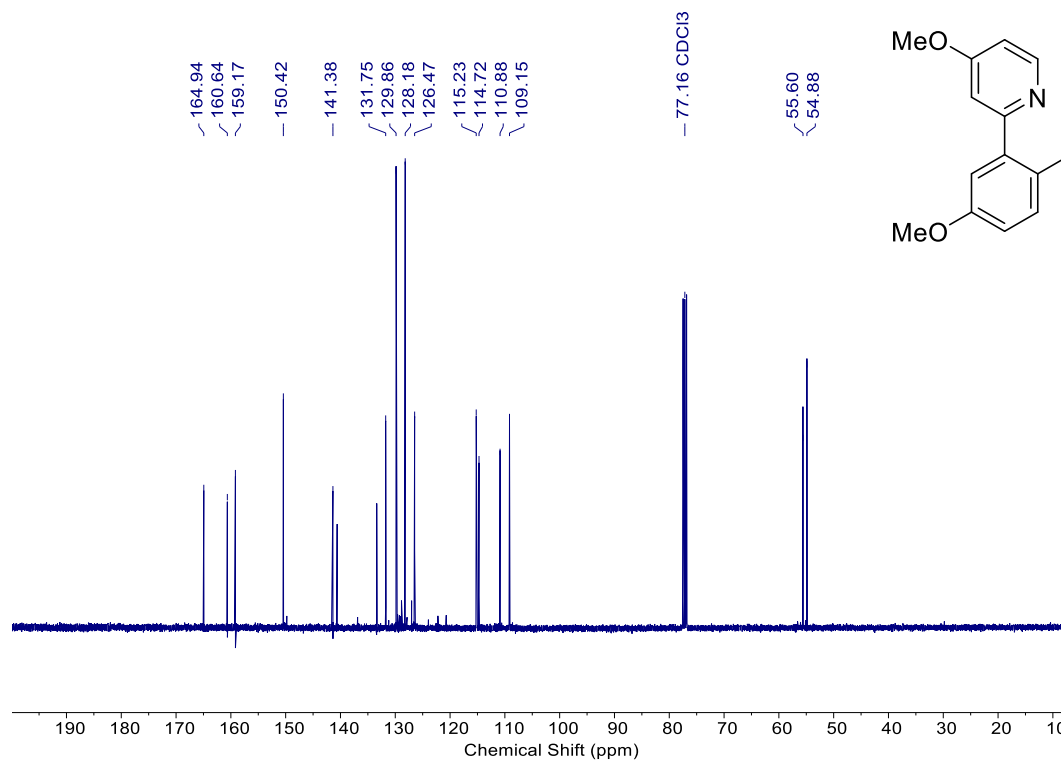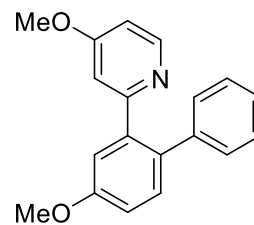

**4u. 2-(2-phenyl)phenylisoquinoline:**

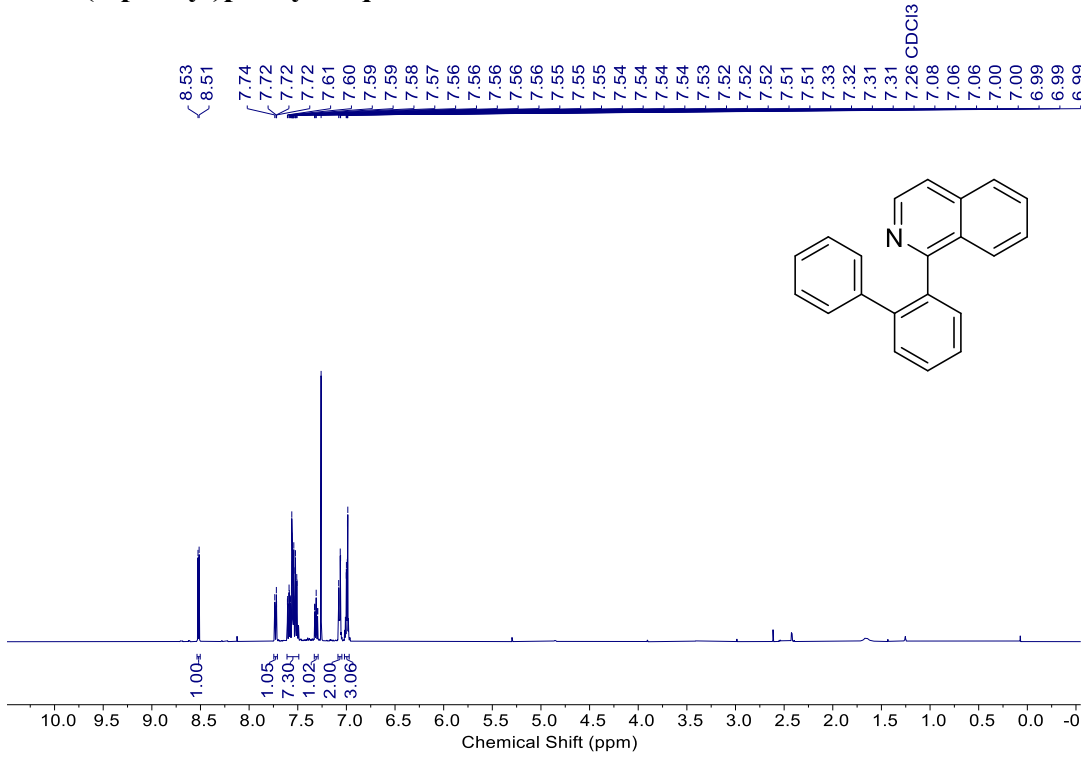

**1,1,2-triphenylethylene:**

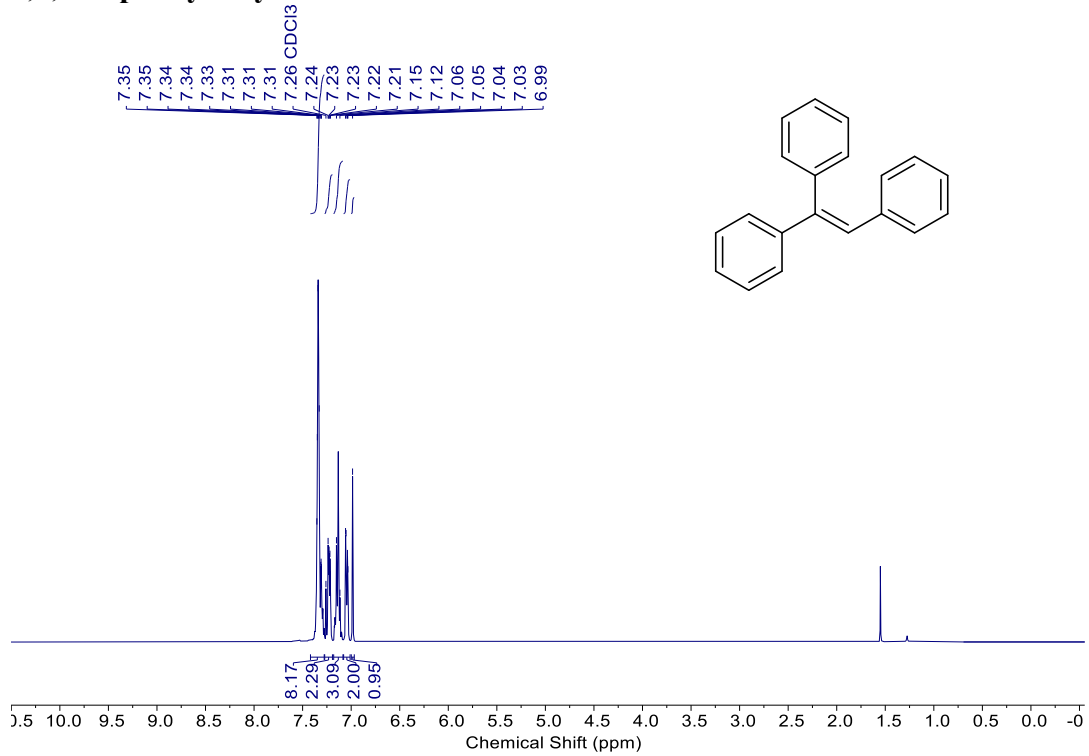

Supplement: d4cc01259c2.pdf [file d4cc01259c2.pdf]
